# Supplementary material for: A multiplex PCR assay for the identification of fruit flies (Diptera: Tephritidae) of economic importance in South Africa
Source: PubMed Central journal article supplement (PMC9338231; doi:10.1038/s41598-022-17382-x), 2022-07-29
Supplement: 41598_2022_17382_MOESM1_ESM.pdf [file 41598_2022_17382_MOESM1_ESM.pdf]

## A Multiplex PCR assay for the identification of fruit flies (Diptera: Tephritidae) of economic importance in South Africa

Kelsey J Andrews<sup>1</sup>, Rachelle Bester<sup>1,2</sup>, Aruna Manrakhan<sup>3,4</sup>, and Hans J Maree<sup>1,2,\*</sup>

Supplementary material:

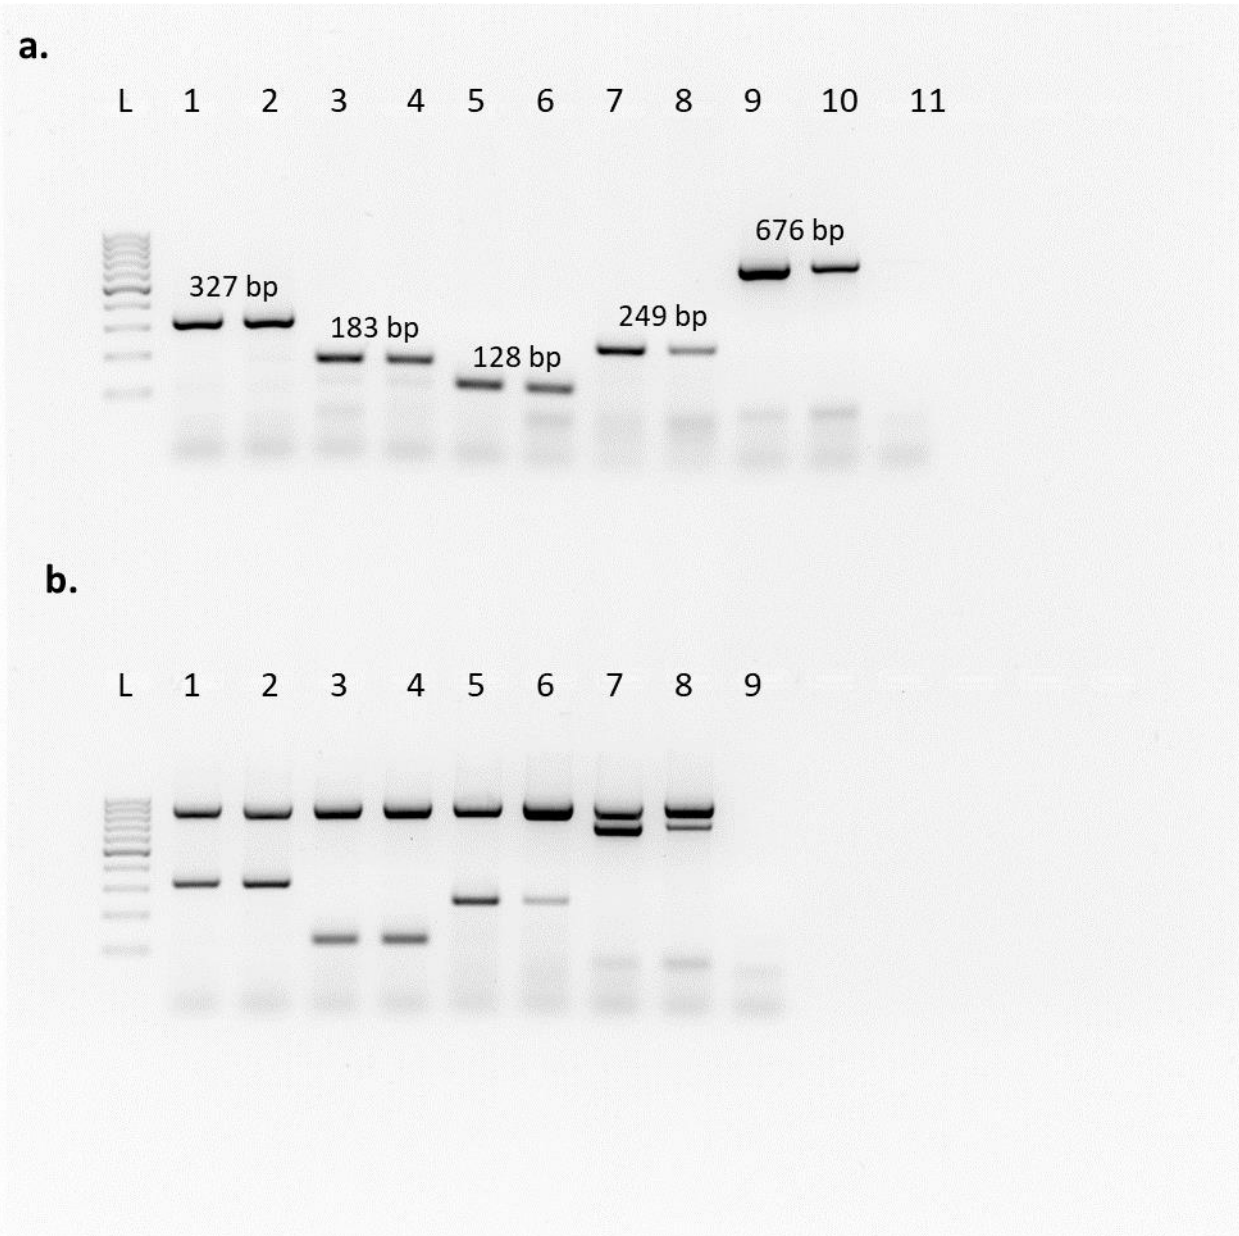

**Figure S1. (a.)** 2% agarose-TAE gel displaying the specificity of the multiplex PCR assay on freshly extracted DNA from colony-reared insects with species-specific amplicon size indicated. Lanes 1 & 2: *C. capitata*, Lanes 3 & 4: *C. cosyra*, Lanes 5 & 6: *C. quilicii*, Lanes 7 & 8: *C. rosa*, Lanes 9 & 10: *B. dorsalis*, Lane 11: No template control, Lane L: GeneRuler 100 bp DNA ladder (Thermo Scientific). **(b.)** 2% agarose-TAE gel displaying the multiplex PCR (excluding *C. cosyra* primers) in conjunction with the universal primer set CI-J2183 and TL2-N3014 amplifying the COI gene in colony reared insects. Lanes 1 & 2: *C. capitata*, Lanes 3 & 4: *C. quilicii*, Lanes 5 & 6: *C. rosa*, Lanes 7 & 8: *B. dorsalis*, Lane 9: No template control, Lane L: GeneRuler 100 bp DNA ladder (Thermo Scientific).

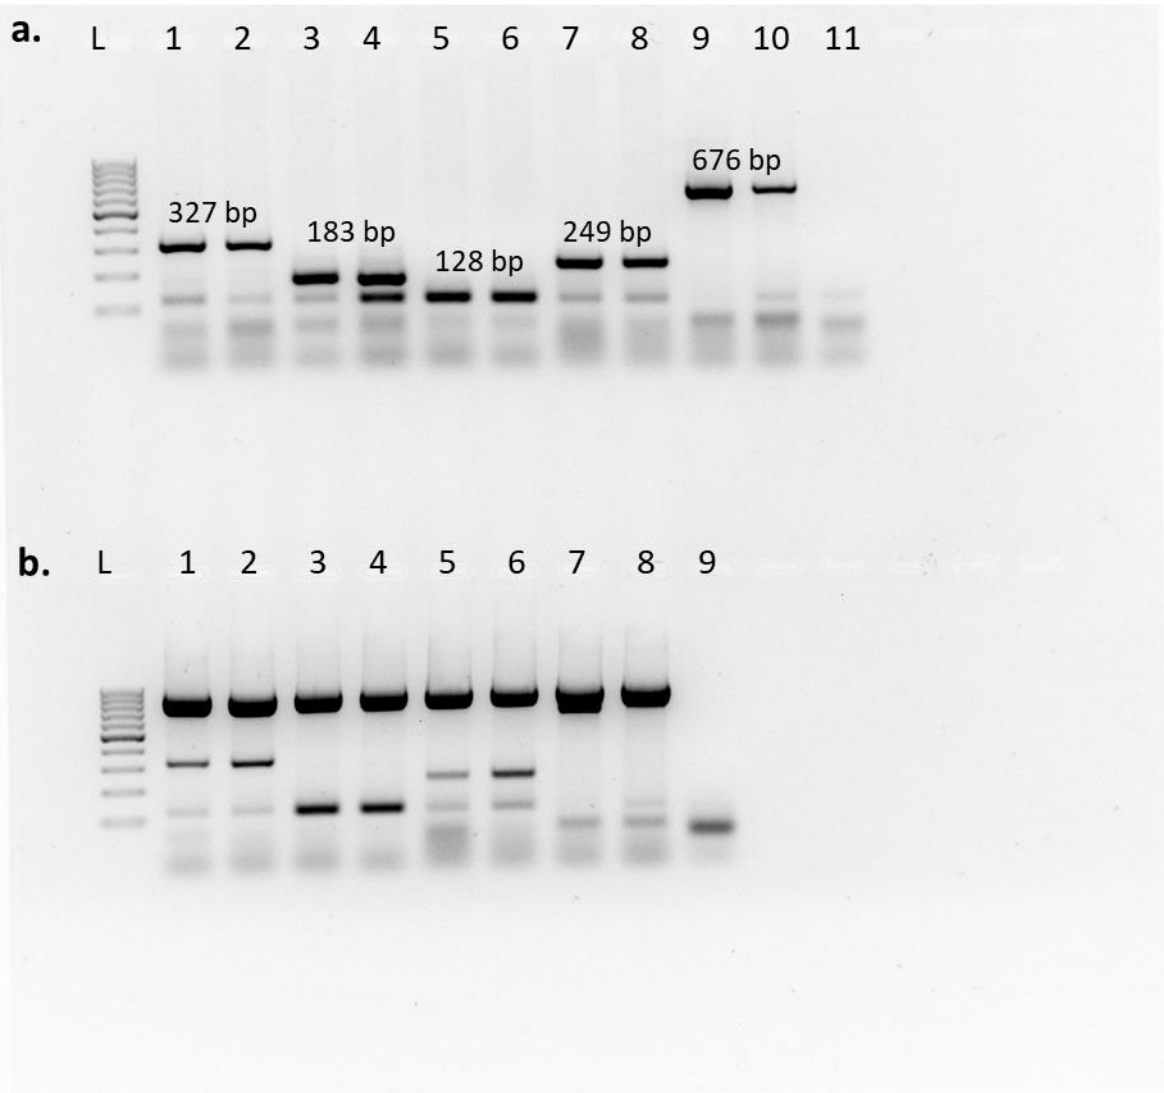

**Figure S2 (a.)** 2% Agarose-TAE gel displaying the specificity of multiplex primers in the case of duplex formation in freshly extracted colony-reared larval DNA with species-specific amplicon size indicated. Lane 4 demonstrates the expected *C. cosyra* amplicon at 183 bp with non-specific amplification at 128 bp leading to the formation of a duplex; the larger 183 bp amplicon should be used for identification. Lane 5 is a single 128 bp amplicon indicative of *C. quilicii*. Lanes 1 & 2: *C. capitata*, Lanes 3 & 4: *C. cosyra*, Lanes 5 & 6: *C. quilicii*, Lanes 7 & 8: *C. rosa*, Lanes 9 & 10: *B. dorsalis*, Lane 11: No template control, Lane L: GeneRuler 100 bp DNA ladder (Thermo Scientific). **(b.)** 2% Agarose-TAE gel displaying the multiplex PCR (excluding *C. cosyra* primers) in conjunction with the universal primer set CI-J2183 and TL2-N3014 amplifying the COI gene in colony reared larvae. Lanes 1 & 2: *C. capitata*, Lanes 3 & 4: *C. quilicii*, Lanes 5 & 6: *C. rosa*, Lanes 7 & 8: *B. dorsalis*, Lane 9: No template control, Lane L: GeneRuler 100 bp DNA ladder (Thermo Scientific).

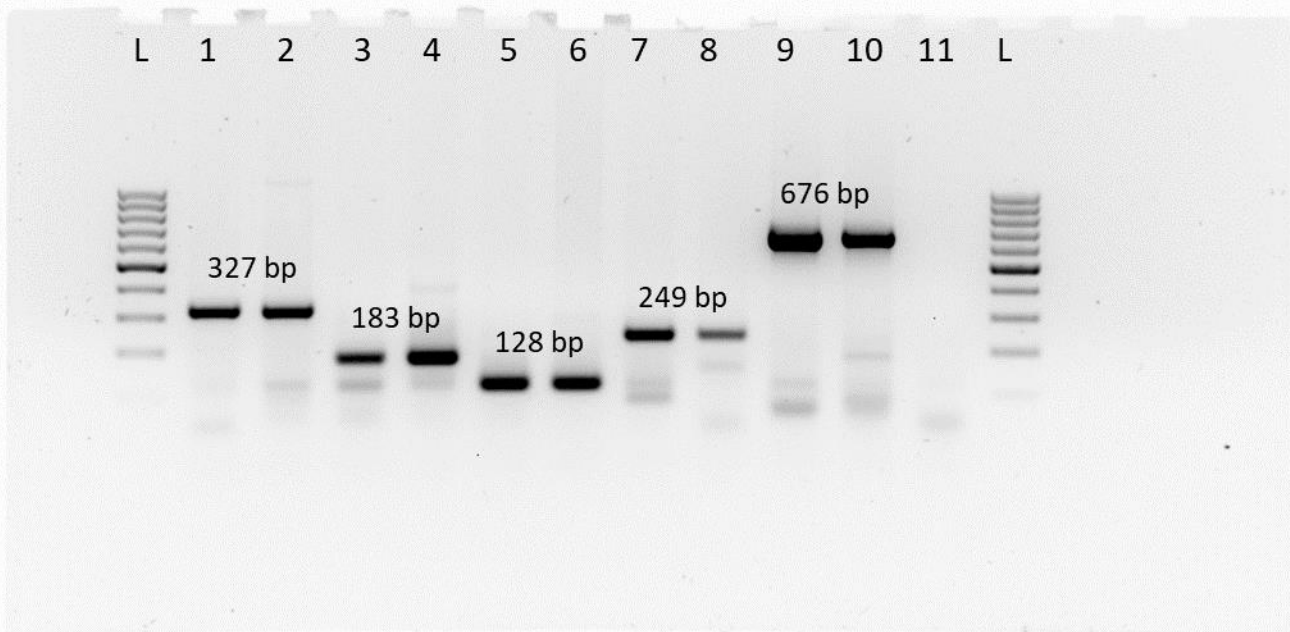

**Figure S3.** 2% agarose-TAE gel displaying the efficacy of the Multiplex PCR assay to identify wild, trap-collected specimens with examples of non-specific amplification. Species-specific amplicon sizes are indicated. Lanes 1 & 2: *C. capitata*, Lanes 3 & 4: *C. cosyra*, Lanes 5 & 6: *C. quilicii*, Lanes 7 & 8: *C. rosa*, Lanes 9 & 10: *B. dorsalis*, Lane 11: No template control, Lane L: GeneRuler 100 bp DNA ladder (Thermo Scientific).

| Life stage | Species            | Rearing fruit    |                                                  | Collection Date | Latitude        | Longitude      |
|------------|--------------------|------------------|--------------------------------------------------|-----------------|-----------------|----------------|
| Adult male | <i>C. capitata</i> | Coffee           | ( <i>Coffea canephora</i> Pierre ex. Froehner)   | 10/03/2019      | 31°5'15.63" E   | 25°6'43.50" S  |
|            | <i>C. cosyra</i>   | Marula           | ( <i>Sclerocarya birrea</i> (A. Rich.) Hochst.)  | 1/29/2019       | 31°2'35.70" E   | 25°28'4.03" S  |
|            | <i>C. quilicii</i> | Peach            | ( <i>Prunus persica</i> L. Batsch)               | 1/21/2020       | 30°23'34.73" E  | 24°59'47.17" S |
|            | <i>C. rosa</i>     | Strawberry Guava | ( <i>Psidium cattleianum</i> Sabine)             | 11/13/2019      | 30°58'10.99" E  | 25°27'08.54" S |
|            | <i>B. dorsalis</i> | Mango            | ( <i>Mangifera indica</i> L.)                    | 1/29/2019       | 30°58'10.99" E  | 25°27'08.54" S |
| Larvae     | <i>C. capitata</i> | Coffee           | ( <i>Coffea canephora</i> Pierre ex. Froehner)   | 3/10/2021       | 31°5'15.63" E   | 25°6'43.50" S  |
|            | <i>C. cosyra</i>   | Pepper-bark tree | ( <i>Warburgia salutaris</i> (Bertol.f.) Chiov.) | 11/30/2020      | 30°58'6.10" E   | 25°26'37.92" S |
|            | <i>C. quilicii</i> | Pineapple guava  | ( <i>Feijoa sellowiana</i> (O.Berg) O.Berg)      | 05/2021         | 29°59' 11.56" E | 26°30'51.31" S |
|            | <i>C. rosa</i>     | Jambos           | ( <i>Syzygium jambos</i> L. Alston)              | 11/27/2020      | 30°58'10.99" E  | 25°27'08.54" S |
|            | <i>B. dorsalis</i> | Mango            | ( <i>Mangifera indica</i> L.)                    | 2/12/2021       | 30°57' 15.84" E | 25°32'58.06" S |

**Table S1.** Origin of colony flies reared at the CRI (Mbombela, Mpumalanga, South Africa). Adult colony insects collected in February 2021 were refreshed between January 2019 and January 2020. Larval specimens collected in August 2021 were refreshed between November 2020 and May 2021. Collection sites are provided as coordinates.

| Species            | Collection date | Province      | Coordinates                    |
|--------------------|-----------------|---------------|--------------------------------|
| <i>B. dorsalis</i> | 08/2021         | Mpumalanga    | 31°04'17.41"E<br>25°26'38.27"S |
|                    | 07/2021         | Mpumalanga    | 30°34'31.48"E<br>25°23'52.07"S |
|                    | 06/2021         | Limpopo       | 30°50'51.95"E<br>24°24'26.61"S |
|                    | 09/2021         | Limpopo       | 30°32'36.02"E<br>23°45'18.95"S |
|                    | 06/2021         | Limpopo       | 30°22'54.60"E<br>23°52'21.32"S |
| <i>C. quilicii</i> | 06/2021         | Northwest     | 25°46'12.9"S<br>27°36'51.7"E   |
|                    | 06/2021         | Mpumalanga    | 25°22'50.7"S<br>30°32'02.2"E   |
|                    | 06/2021         | KwaZulu Natal | 27°21'44.7"S<br>31°47' 14.4"E  |
|                    | 03/2021         | Free State    | 28°15'09.1"S<br>28°19'02.E     |
|                    | 06/2021         | Eastern Cape  | 33°36'43.4"S<br>25°39'39.1"E   |
| <i>C. capitata</i> | 06/2021         | Northwest     | 25°46'12.9"S<br>27°36'51.7"E   |
|                    | 06/2021         | Limpopo       | 23°51'47.7"S<br>30°23'08.4"E   |
|                    | 06/2021         | Mpumalanga    | 25°26'39.3"S<br>31°33'15.4"E   |
|                    | 06/2021         | KwaZulu Natal | 27°21'44.7"S<br>31°47' 14.4"E  |
|                    | 05/2021         | Northern Cape | 28°48'8.83"S<br>20°39'56.2"E   |
| <i>C. cosyra</i>   | 06/2021         | Northwest     | 25°46'12.9"S<br>27°36'51.7"E   |
|                    | 06/2021         | Limpopo       | 23°51'47.7"S<br>30°23'08.4"E   |
|                    | 06/2021         | Mpumalanga    | 25°24'34.3"S<br>30°55'46.6"E   |
|                    | 08/2021         | KwaZulu Natal | 27°21'44.7"S<br>31°47'14.4"E   |
| <i>C. rosa</i>     | 06/2021         | Mpumalanga    | 25°26'44.9"S<br>30°58'05.1"E   |

**Table S2.** Sample collection data for the wild, trap-collected specimens used for assay validation in this study. The collection site is provided as the province and coordinates

| Gene region investigated                      | Reference sequence <i>C. capitata</i> | Reference sequence <i>B. dorsalis</i> | Literature cited |
|-----------------------------------------------|---------------------------------------|---------------------------------------|------------------|
| Cytochrome c oxidase subunit I                | MW410928.1                            | MZ621836.1                            | <sup>1,2</sup>   |
| Cytochrome c oxidase subunit II               | NC_000857.1                           | KT343905.1                            | <sup>1,2</sup>   |
| Protein MTO1 homolog                          | XM_004517805.4                        | XM_011208269.2                        |                  |
| Glutamine synthetase 1, mitochondrial         | XM_004530302.3                        | XM_011209495.2                        | <sup>3</sup>     |
| Presequence protease, mitochondrial           | XM_004535774.4                        | XM_019991906.1                        | <sup>4</sup>     |
| ERF3A                                         | GAMC01016820.1                        | GAKP01021067.1                        | <sup>5</sup>     |
| Dynamin                                       | GAMC01011620.1                        | XM_011213658.3                        | <sup>6</sup>     |
| TipE                                          | XM_012302544.2                        | XM_019992132.1                        | <sup>7</sup>     |
| Gustatory receptor for bitter taste 22e-like  | XM_023303386.1                        | XM_011212444.1                        | <sup>8</sup>     |
| Gustatory and pheromone receptor 32a          | XM_004526635.3                        | XM_019991446.1                        |                  |
| CCR4-NOT transcription complex subunit 6-like | XM_012300675.2                        | XM_019990104.1                        |                  |
| Toll-like receptor Tollo                      | XM_004522201.2                        | XM_011209703.2                        |                  |
| Gawky                                         | XM_020860629.1                        | XM_011203056.2                        |                  |
| Opsin Rh2                                     | XM_004534311.3                        | XM_011205152.2                        |                  |
| Opsin Blue Sensitive                          | XM_004525726.3                        | N/A                                   |                  |
| Opsin Rh4                                     | XM_004526176.3                        | XM_011215866.2                        |                  |
| Opsin Rh1                                     | XM_004535527.3                        | XM_018947745.1                        |                  |
| Opsin Rh6                                     | XM_004518077.2                        | XM_011209950.2                        |                  |

**Table S3.** List of gene regions utilized in the preliminary bioinformatic analysis, including accession numbers of the reference sequences and the literature from which they were selected.

### References:

1. Garzón-Orduña, I. J., Geib, S. M., Ledezma, L., Bremer, F. T. & Barr, N. B. Implementing Low-Cost, High Accuracy DNA Barcoding From Single Molecule Sequencing to Screen Larval Tephritid Fruit Flies Intercepted at Ports of Entry. *Ann. Entomol. Soc. Am.* **113**, 288–297 (2020).
2. Armstrong, K. F. & Ball, S. L. DNA barcodes for biosecurity: invasive species identification. *Philos. Trans. R. Soc. B Biol. Sci.* **360**, 1813–1823 (2005).
3. Killer, J. *et al.* Glutamine synthetase type I (glnAI) represents a rewarding molecular marker in the classification of bifidobacteria and related genera. *Folia Microbiol. (Praha)*. **65**, 143–151 (2020).
4. Alikhani, N. *et al.* Targeting Capacity and Conservation of PreP Homologues Localization in Mitochondria of Different Species. *J. Mol. Biol.* **410**, 400–410 (2011).
5. Tarasov, O. V., Zhuravleva, G. A. & Abramson, N. I. Evaluation of the gene encoding translation termination factor eRF3 as a possible phylogenetic marker. *Mol. Biol.* **42**, 834–842 (2008).
6. Hardy, N. B. Phylogenetic utility of dynamin and triose phosphate isomerase. *Syst. Entomol.* **32**, 396–403 (2007).
7. Bourdin, C. M. *et al.* Molecular and functional characterization of a novel sodium channel TipE-like auxiliary subunit from the American cockroach *Periplaneta americana*. *Insect Biochem. Mol. Biol.* **66**, 136–144 (2015).
8. Papanicolaou, A. *et al.* The whole genome sequence of the Mediterranean fruit fly, *Ceratitidis capitata* (Wiedemann), reveals insights into the biology and adaptive evolution of a highly invasive pest species.

*Genome Biol.* **17**, 192 (2016).
